# Supplementary material for: Dalbavancin in Real Life: Economic Impact of Prescription Timing in French Hospitals
Source: Springer Nature journal article supplement (doi:10.1007/s40121-021-00577-6), 2021-12-15
Supplement: MOESM1 [file 19962648]

**Supplementary material:**

Dalbavancin in Real Life: Economic Impact of Prescription Timing in French Hospitals

Guillaume Béraud<sup>1</sup>, Jean-Claude Maupetit<sup>2</sup>, Audric Darras<sup>3</sup>, Alexandre Vimont<sup>4</sup>, Martin Blachier<sup>4</sup>

1: Department of Internal Medicine and Infectious Diseases, University Hospital of Poitiers, Poitiers, France,

2: Hospital pharmacy, University Hospital of Nantes, Nantes, France,

3: UNIHA Tender, Hospital pharmacy, University Hospital of Toulouse, Toulouse, France,

4: Public Health Expertise, Paris, France

Corresponding author:

Dr. Guillaume Béraud,

University hospital of Poitiers, Poitiers, France

+33 (0)6.82.75.27.26

[guillaume@beraud.pro](mailto:guillaume@beraud.pro)

**Dalbavancin Budget Impact Tool:**

<https://github.com/darkdoudou/DalbavancinBudgetImpact/blob/c819519f6f0cd0738966a7cb4a2cb4d80b72bdbd/DalbavancinBudgetImpactTool.xlsx>

**Supplementary Table 1:** Comorbidities, pathogens and number of lines of treatment before dalbavancin. The maximum was 12500 for bone and joint infections.

|                                         | N           | Diabetes | Obesity | IVDU | Cancer | Cirrhosis | Polyarthritis | Immuno depression | HTA | Other | MSSA | MRSA | Coag. neg. Staph | MRE S | Streptococcus spp. | E. faecium | E. faecalis | Corynebacterium | Autere | Non identified |
|-----------------------------------------|-------------|----------|---------|------|--------|-----------|---------------|-------------------|-----|-------|------|------|------------------|-------|--------------------|------------|-------------|-----------------|--------|----------------|
| Bloodstream infections                  | 10<br>(6%)  | 30%      | -       | 20%  | 60%    | 10%       | -             | 20%               | 50% | 60%   | 30%  | 50%  | -                | 10%   | 10%                | -          | -           | -               | -      | -              |
| Infective endocarditis                  | 29<br>(19%) | 10%      | 3%      | 17%  | 14%    | 7%        | -             | 3%                | 31% | 38%   | 31%  | 14%  | 17%              | 14%   | 3%                 | 7%         | 21%         | -               | 10%    | 3%             |
| Bone and joint infections               | 86<br>(56%) | 17%      | 7%      | 2%   | 8%     | 2%        | 14%           | 3%                | 38% | 50%   | 23%  | 14%  | 9%               | 40%   | 8%                 | 5%         | 10%         | 15%             | 15%    | 1%             |
| Soft tissue infections                  | 10<br>(6%)  | 20%      | 20%     | -    | 10%    | 10%       | -             | 10%               | 30% | 60%   | 10%  | 10%  | -                | 10%   | 10%                | -          | -           | -               | 30%    | 40%            |
| Catheter-related bloodstream infections | 9<br>(6%)   | -        | -       | -    | 44%    | -         | 11%           | 22%               | 33% | 22%   | 11%  | -    | 11%              | 78%   | -                  | -          | -           | -               | -      | -              |

|                         |           |     |     |     |     |    |    |     |     |      |     |     |     |     |      |     |     |    |     |    |
|-------------------------|-----------|-----|-----|-----|-----|----|----|-----|-----|------|-----|-----|-----|-----|------|-----|-----|----|-----|----|
| Endovascular infections | 2<br>(1%) | -   | -   | -   | -   | -  | -  | -   | -   | 50%  | -   | -   | -   | -   | 100% | -   | -   | -  | -   | -  |
| Others                  | 6<br>(4%) | -   | 17% | -   | 17  | -  | -  | 17% | 67% | 83%  | -   | -   | 17% | 67% | 0%   | 17% | 17% | -  | 33% | -  |
| Missing                 | 2<br>(1%) | 50% | 50  | 50% | -   | -  | -  | -   | 50% | 100% | 50% | 50% | -   | -   | 50%  | -   | 50% | -  | 50% | -  |
| Total                   | 154       | 16% | 7%  | 6%  | 15% | 4% | 8% | 6%  | 38% | 49%  | 23% | 15% | 10% | 33% | 8%   | 5%  | 11% | 8% | 14% | 4% |

**Supplementary Table 2:** Five antimicrobials represented 77% of the preliminary antimicrobials used alone or in combination against gram-positive cocci before dalbavancin was used in the second position. The same five antimicrobials represented 58% of the preliminary antimicrobials used alone or in combination against gram-positive cocci before dalbavancin was used in the third position.

|                           | N   | L1          | L2          | Post DAP                    | Post VAN        | Post LZD          | Post AMX          | Post TEC        | L3          | Post DAP    | Post VAN  | Post LZD    | Post AMX    | Post TEC  |
|---------------------------|-----|-------------|-------------|-----------------------------|-----------------|-------------------|-------------------|-----------------|-------------|-------------|-----------|-------------|-------------|-----------|
| Infective endocarditis    | 29  | 1           | 10          | 1                           | 1               | 1                 | 3                 | 0               | 13          | 7           | 1         | 3           | 5           | 1         |
| Bone and joint infections | 86  | 12          | 39          | 13                          | 3               | 9                 | 5                 | 1               | 23          | 9           | 3         | 6           | 3           | 2         |
| Soft tissue infections    | 10  | 0           | 7           | 1                           | 1               | 0                 | 3                 | 0               | 3           | 0           | 0         | 3           | 2           | 0         |
| Total                     | 125 | 13<br>(10%) | 56<br>(45%) | 15<br>(27%<br>out of<br>L2) | 5<br>(9%<br>L2) | 10<br>(18%<br>L2) | 12<br>(21%<br>L2) | 1<br>(2%<br>L2) | 39<br>(31%) | 16<br>(21%) | 4<br>(5%) | 12<br>(15%) | 10<br>(13%) | 3<br>(4%) |

**Supplementary Table 3: Comparison with Dinh et al**

| Characteristics of patients treated by dalbavancin               | DINH et al. (2017-2018) | BERAUD et al. (2019) | p                           |
|------------------------------------------------------------------|-------------------------|----------------------|-----------------------------|
| N                                                                | 75                      | 154                  |                             |
| Age (mean)(SD)                                                   | 63.1(17)                | 63.8(19.5)           | 0.54                        |
| Age (median, Min-Max)                                            |                         | 69 (15-94)           |                             |
| IMC (median, Min-Max)                                            |                         | 26 (14-56)           |                             |
| Ratio (M/F)                                                      | 2.26                    | 2.14                 | 0.980<br>1                  |
| Number of participating centres                                  | 29                      | 24                   |                             |
| Comorbidities (mean)(SD)                                         | -                       | 4.7(6.7)             |                             |
| Previous antibiotic treatment: number of lines (mean)(SD)        | 2.3(1.2)                | 1.6(1,3)             | <b>&lt;.000</b><br><b>1</b> |
| Previous antibiotic treatment: duration (days) (median)[min-max] | 22.5[14.3 - 39.8]       | 11[4.0 - 24.0]       | <b>0.000</b><br><b>2</b>    |
| Documented infections, n (%)                                     | 72 (96)                 | 154 (100)            |                             |
| Polymicrobial infections, n (%)                                  | 25 (35)                 | 39 (25)              | 0.838<br>2                  |
| Staph. sp. (=S.aureus + CoNS+ S.p), n (%)                        | 69 (96)                 | 137 (89)             | 0.732<br>4                  |
| S. aureus (=MSSA + MRSA), n (%)                                  | 37 (51)                 | 59 (38)              | 0.788<br>8                  |
| MSSA, n (%)                                                      | 23 (32)                 | 35 (23)              | 0.847<br>9                  |
| MRSA, n (%)                                                      | 14 (19)                 | 23 (15)              | 0.910<br>6                  |
| CoNS (total cons epi serm), n (%)                                | 32 (44)                 | 66 (43)              | 0.976<br>8                  |
| S. epi, n (%)                                                    | 24 (33)                 | -                    |                             |
| SERM, n (%)                                                      | 15 (21)                 | 51 (51)              | 0.764                       |

---

|                                |         |         |            |
|--------------------------------|---------|---------|------------|
|                                |         |         | 5          |
| Staph. spp., n (%)             | -       | 12 (8)  |            |
| E. faecalis, n (%)             | 5 (7)   | 17 (11) | 0.873<br>2 |
| E. faecium, n (%)              | 0 (0)   | 8 (5)   |            |
| Corynebacterium spp., n (%)    | 5 (7)   | 12 (8)  | 0.966<br>9 |
| autre ou NI, n (%)             | -       | 28 (18) |            |
| BJI, n (%)                     | 48 (64) | 86 (56) | 0.818<br>4 |
| EI, n (%)                      | 19 (25) | 29 (19) | 0.863<br>8 |
| SSTI, n (%)                    | 13 (17) | 10 (6)  | 0.763<br>7 |
| Vascular infection, n (%)      | 5 (7)   | 2 (1)   | 0.824<br>2 |
| Catheter line infection, n (%) | 4 (5)   | 9 (6)   | 0.989<br>9 |
| Bloodstream infection, n (%)   | 3 (4)   | 9 (6)   | 0.933<br>1 |
| Mediastinitis, n (%)           | 2 (3)   | 2 (1)   | 0.928<br>3 |
| Autre, n (%)                   | 0 (0)   | 5 (3)   |            |

---

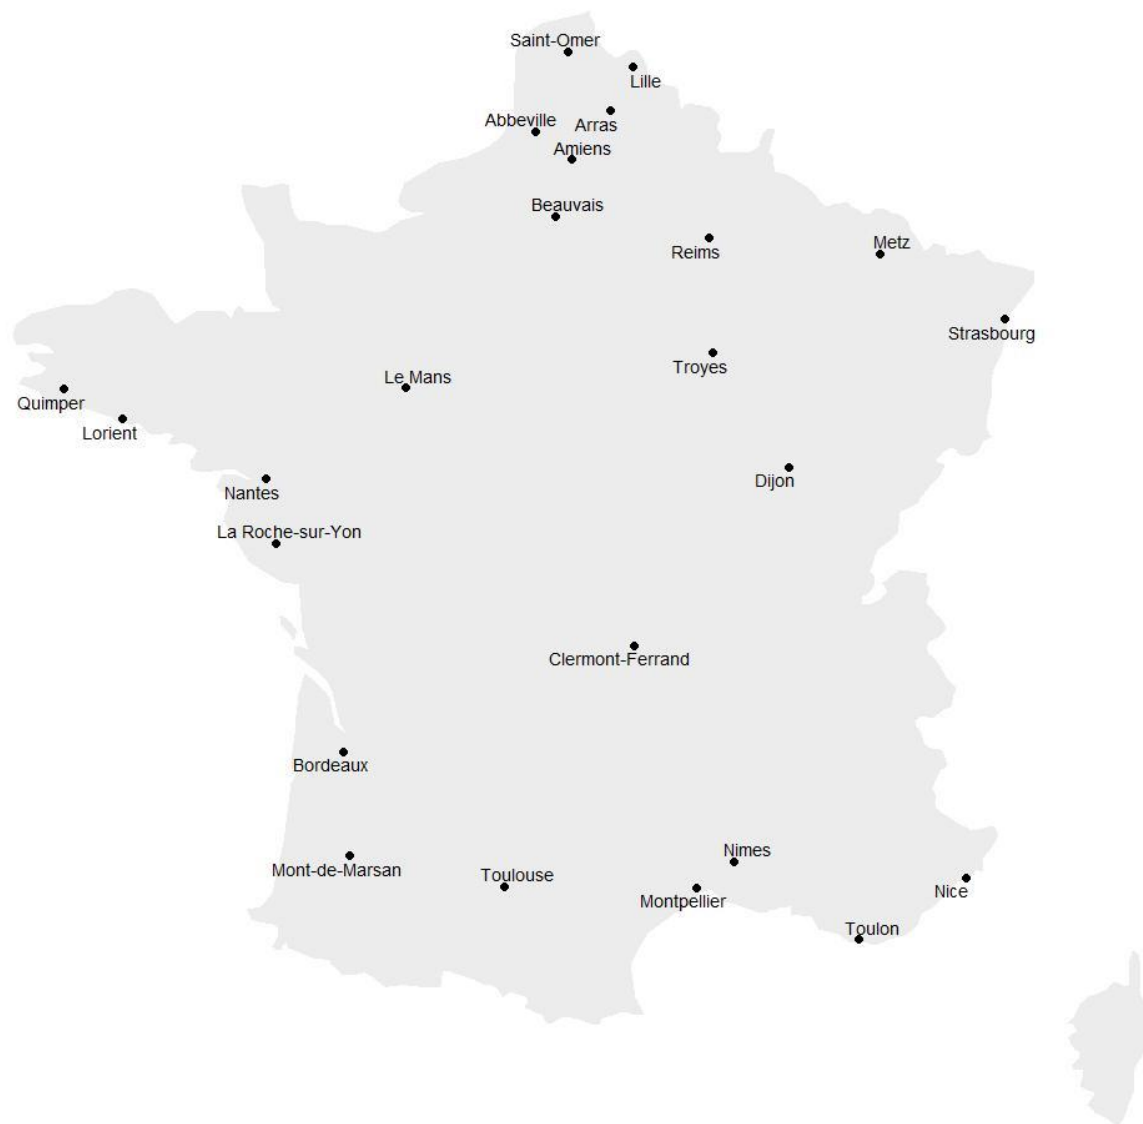

**Supplementary figure 1: Establishments participating in the UNIHA 2019 cohort.**



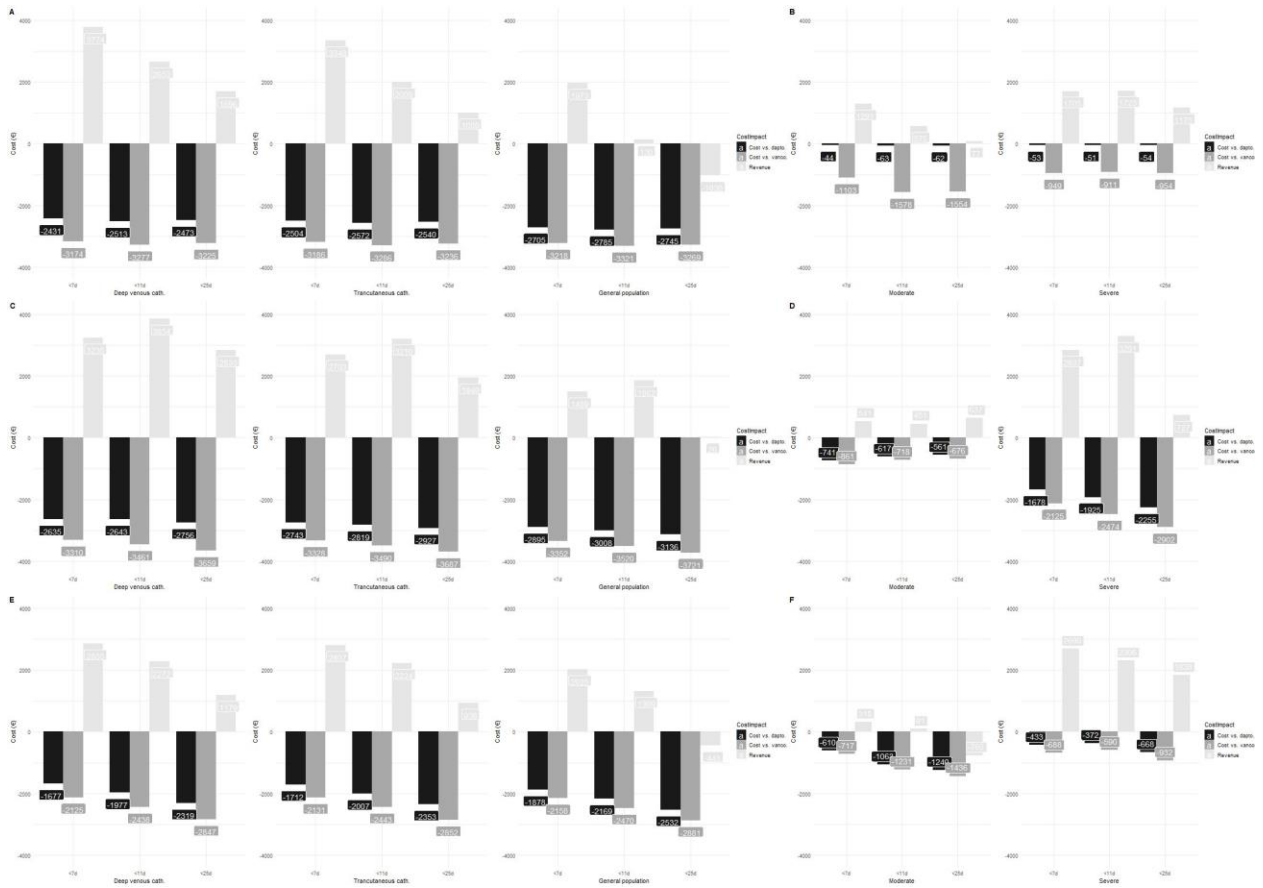

**Supplementary figure 2: Cost and revenue provided by the use of dalbavancin instead of daptomycin or vancomycin according to infection site (A-B: Bone joint and infections, C-D: Infectious endocarditis, E-F: Acute bacterial skin and skin structure infections), catheter type (A, C, E) and severity (B, D, F).**
